# Supplementary material for: Use of a New Non-Pyrophoric Liquid Aluminum Precursor for Atomic Layer Deposition
Source: MDPI journal article supplement (doi:10.3390/ma12091429), 2019-05-02
Supplement: s1 [file s1]

## Supplementary Materials

### Use of a New Non-Pyrophoric Liquid Aluminium Precursor for Atomic Layer Deposition

Xueming Xia <sup>1</sup>, Alaric Taylor <sup>2</sup>, Yifan Zhao <sup>3</sup>, Stefan Guldin <sup>2</sup> and Chris Blackman <sup>1,\*</sup>

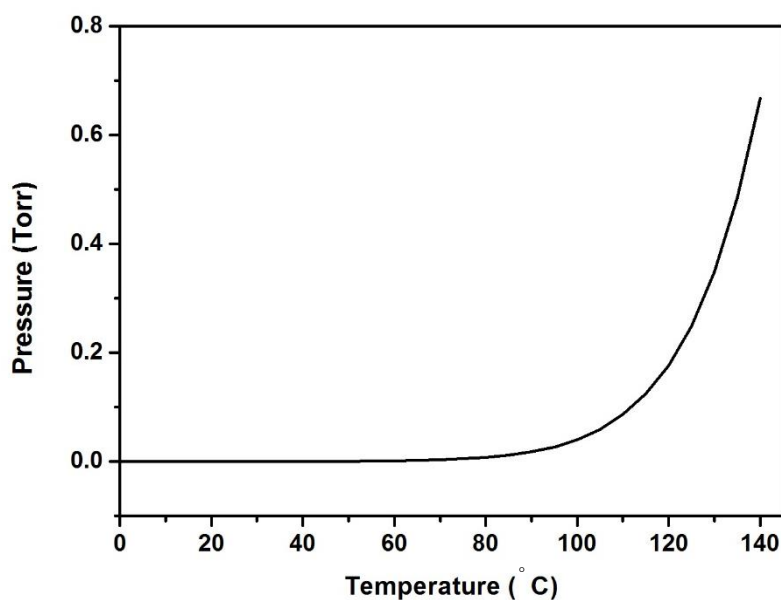

**Figure S1.** The relationship between ATSB vapour pressure and ATSB precursor temperature.

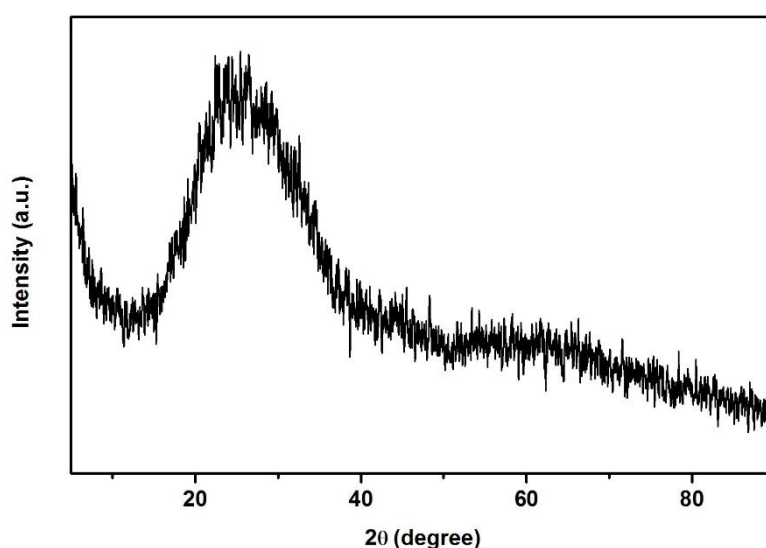

**Figure S2.** XRD pattern of Al<sub>2</sub>O<sub>3</sub> film deposited via CVD. This example was made under condition: precursor temperature 120 °C; deposition temperature 350 °C; gas flow rate 150 sccm; deposition time 24 h.

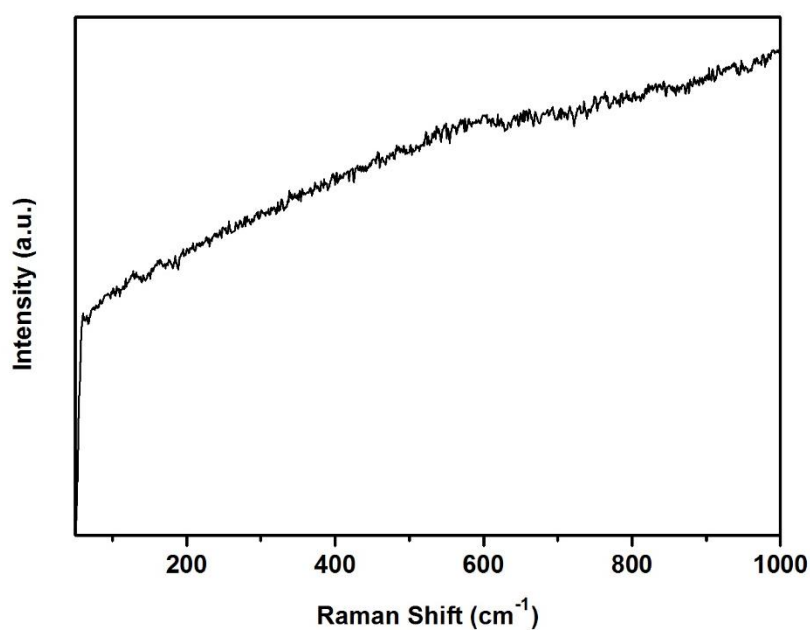

**Figure S3.** Raman spectra of  $\text{Al}_2\text{O}_3$  film deposited via CVD. This example was made under condition: precursor temperature 120 °C; deposition temperature 350 °C; gas flow rate 150 sccm; deposition time 24 h.

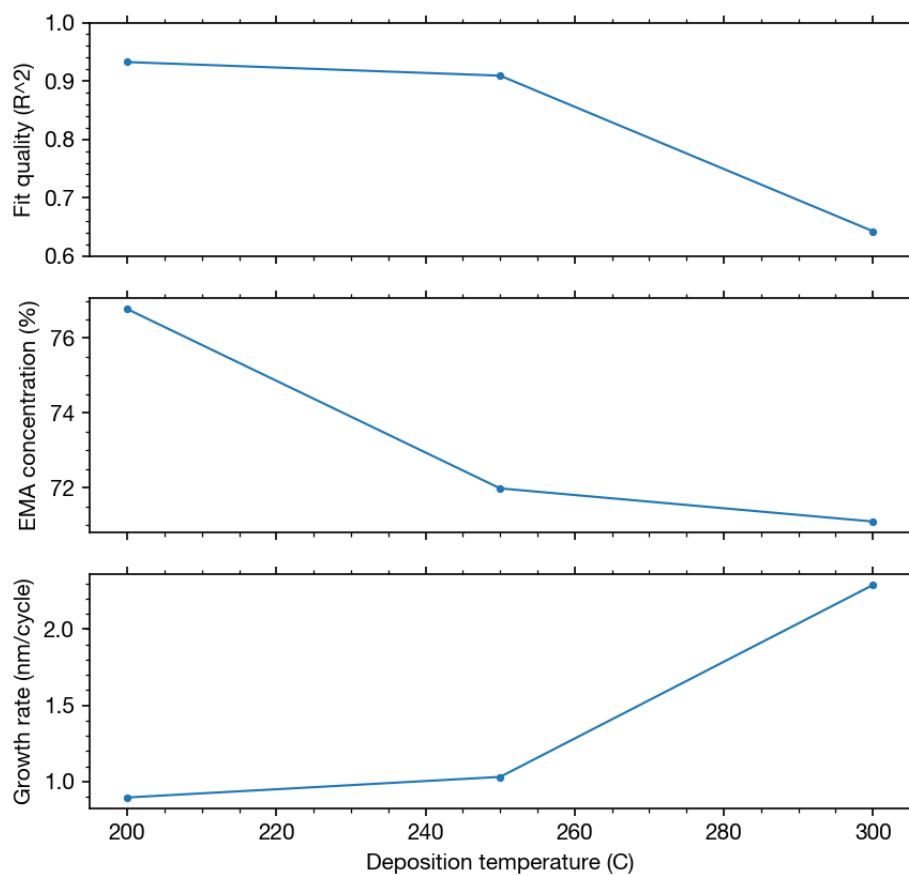

**Figure S4.** Growth rates of the  $\text{Al}_2\text{O}_3$  films as a function of deposition temperature from 200 °C to 300 °C established via ellipsometry. The deposition conditions were 20 s ATSB pulse, 1 min Ar purge, 2 s  $\text{H}_2\text{O}$  pulse and 3 min Ar pulse for 500 cycles.

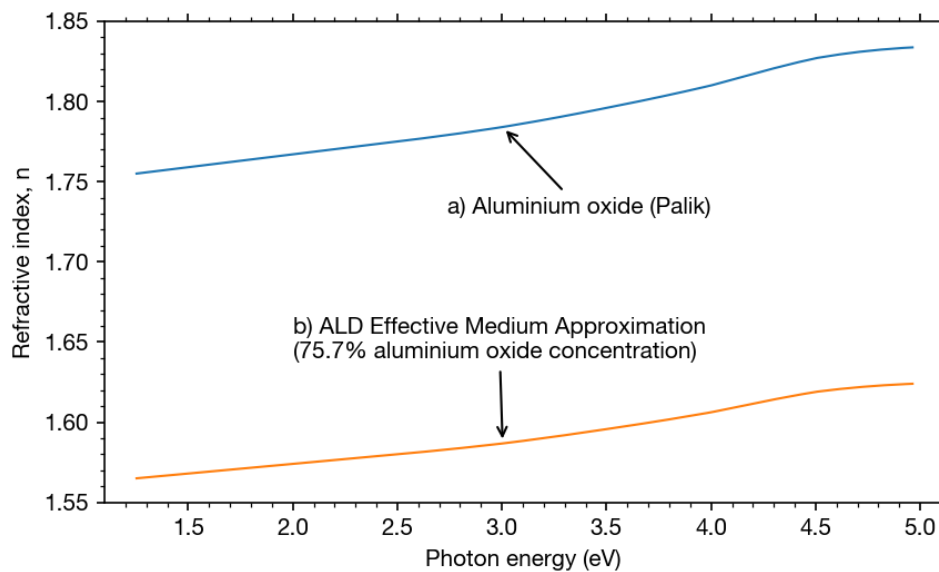

**Figure S5.** Refractive index of (a)  $\text{Al}_2\text{O}_3$  [23], and (b)  $\text{Al}_2\text{O}_3/\text{air}$  (0.757/0.243) Effective Medium Approximation used for ellipsometric modelling of ALD film on glass, Figure 6e.

**Table S1.** Table of structural parameters from for ellipsometric model fitting between (1.25–5 eV) for samples produced via ALD (250 cycles: ATSB pulse indicated, 3 min purge, 2 s  $\text{H}_2\text{O}$  pulse, 3 min purge).

| AFM<br>Shown<br>(Figure) | Substrate | ATSB<br>Dose (s) | Layer<br>Thickness<br>(nm) | EMA<br>Concentration<br>(%) | Refractive<br>Index @<br>632.8 nm | Fit<br>Quality,<br>$R^2$ | Growth Rate<br>(nm/cycle) |
|--------------------------|-----------|------------------|----------------------------|-----------------------------|-----------------------------------|--------------------------|---------------------------|
| 6a & b                   | silicon   | 2.5              | 29.8                       | 74.5                        | 1.56                              | 0.997                    | 0.12                      |
| 6c & d                   | quartz    | 2.5              | 37.7                       | 74.2                        | 1.56                              | 0.965                    | 0.15                      |
| 6e & f                   | glass     | 2.5              | 31.2                       | 75.7                        | 1.57                              | 0.916                    | 0.12                      |
| -                        | glass     | 20               | 257.8                      | 72.0                        | 1.54                              | 0.909                    | 1.03                      |

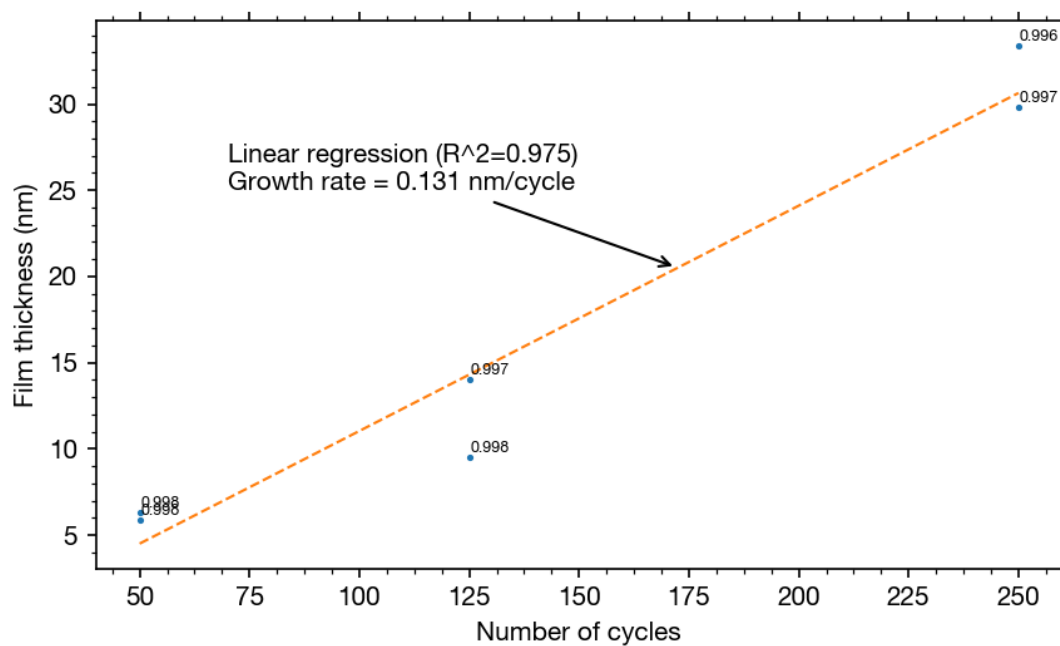

**Figure S6.** Film thicknesses established via Ellipsometry for ALD growth on Silicon samples ( $R^2$  fit quality for each ellipsometric fitting labelled). EMA concentration for all samples held at 74.5%. ATSB pulse duration 2.5 s.

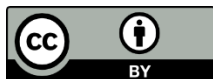

© 2019 by the authors. Licensee MDPI, Basel, Switzerland. This article is an open access article distributed under the terms and conditions of the Creative Commons Attribution (CC BY) license (<http://creativecommons.org/licenses/by/4.0/>).
